# Supplementary material
Source: PubMed Central journal article supplement (PMC3361388)
Supplement: 1200407109_pnas.201200407SI.pdf [file 1200407109_pnas.201200407SI.pdf]

# Supporting Information

Ivanov et al. 10.1073/pnas.1200407109

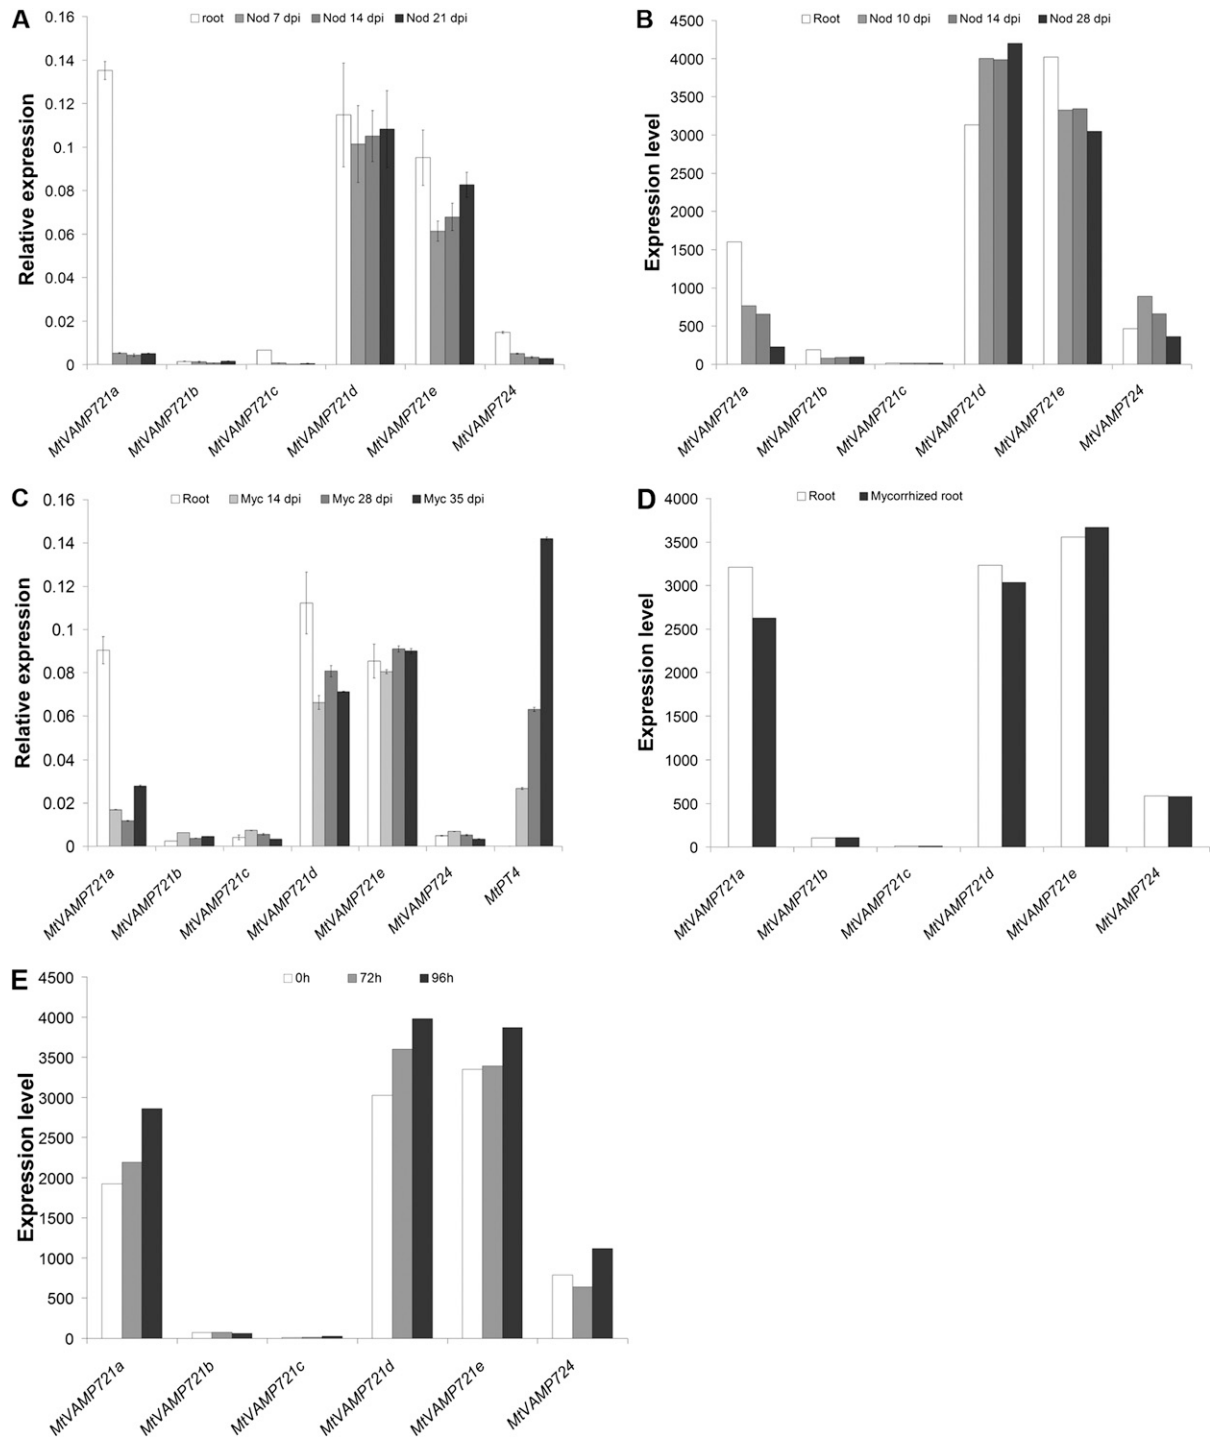

**Fig. S1.** Expression profile of *MtVAMP72s*. (A and C) Quantitative RT-PCR (qRT-PCR) profile of *MtVAMP72s*. qRT-PCR was conducted on RNA isolated from roots and nodules (Nod) 7, 14, and 21 d postinoculation (dpi) with *Sinorhizobium meliloti* 2011 (A) and roots colonized by *Glomus intraradices* 14, 28, and 35 dpi. *MtVAMP72s* gene-expression profiles were normalized against transcription level of reference gene *MtUBQ10*. Values represent means of triplicate runs on two independent biological samples. Error bars indicate SDs. This shows that *MtVAMP721d* and *MtVAMP721e* are highly expressed in root nodules. (B, D, and E) Gene-expression profile of *MtVAMP72s* based on *Medicago truncatula* Gene Expression Atlas data (<http://mtgea.noble.org/v2/>) in nodules 10, 14, and 28 dpi (B), mycorrhized roots (D) and roots 72 and 96 h after infection by pathogenic fungus *Phymatotrichopsis omnivore* (Phymatotrichum) (E). Note, that none of the *MtVAMP721* homologs show a striking transcriptional regulation upon infection by *P. omnivore*, although the nonsymbiotic *MtVAMP721a* appears to be slightly induced.



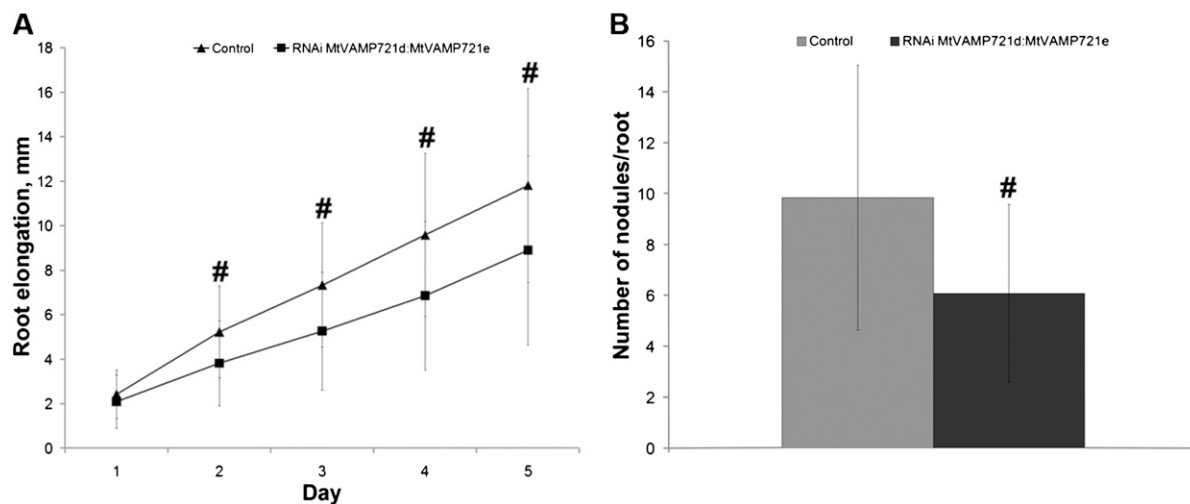

**Fig. S3.** Effect of *RNAi<sub>VAMP721d:VAMP721e</sub>* on root growth and number of nodules. (A) Root elongation of *RNAi<sub>VAMP721d:VAMP721e</sub>* transgenic roots ( $n = 20$ ) was measured in 24-h intervals during 5 d and compared with root elongation of transgenic roots expressing an empty vector control ( $n = 20$ ). “#” indicates statistically significant difference (day 1,  $P = 0.222$ ; day 2,  $P = 0.008$ ; day 3,  $P = 0.005$ ; day 4,  $P = 0.005$ ; day 5,  $P = 0.016$ ). (B) Nodule number was counted on each *RNAi<sub>VAMP721d:VAMP721e</sub>* transgenic root ( $n = 15$ ) and compared with transgenic control roots ( $n = 15$ ). “#” indicates statistically significant difference ( $P = 0.05$ ). ANOVA test was used for statistical analysis.

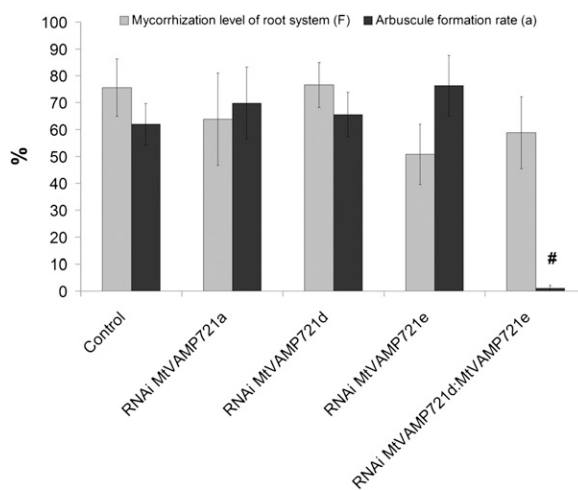

**Fig. S4.** Arbuscule formation is compromised in *RNAi<sub>MtVAMP721d:MtVAMP721e</sub>* transgenic roots. The *G. intraradices* mycorrhization level of the root system (parameter  $M$ ) is equal in control and *RNAi<sub>MtVAMP721d:MtVAMP721e</sub>* roots ( $n = 5$ ,  $P = 0.06$ ). However, mature arbuscule abundance (parameter  $a$ ) in *RNAi<sub>MtVAMP721d:MtVAMP721e</sub>* roots is significantly decreased ( $n = 5$ ,  $P = <0.001$ , “#” indicates statistically significant difference). There was no difference in parameter  $a$  between control and *RNAi<sub>MtVAMP721a</sub>* ( $n = 5$ ,  $P = 0.249$  and  $P = 0.302$ ), *RNAi<sub>MtVAMP721d</sub>* ( $n = 5$ ,  $P = 0.883$  and  $P = 0.498$ ), or *RNAi<sub>MtVAMP721e</sub>* ( $n = 5$ ,  $P = 0.529$  and  $P = 0.629$ ). Transgenic roots were harvested from composite plants 4 wk after *G. intraradices* inoculation, stained by Trypan blue, and analyzed by light microscopy. Seventy-five centimeters of each transgenic root system was analyzed. Error bars indicate SD. ANOVA test was used for statistical analysis.

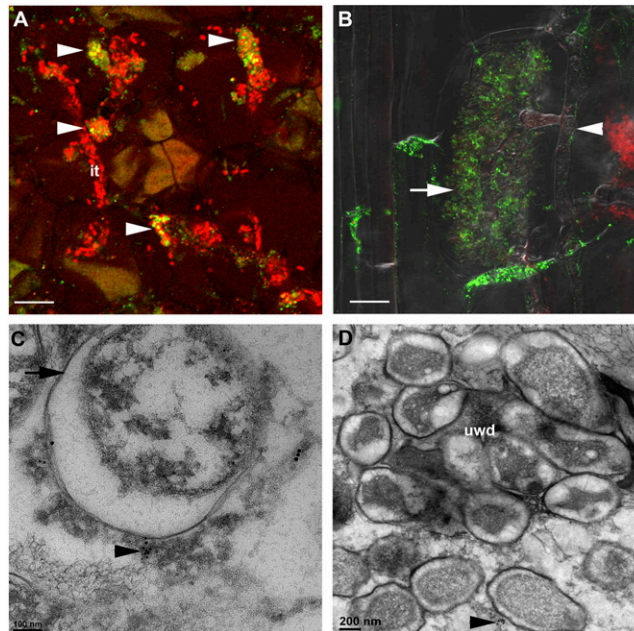

**Fig. S5.** Localization of MtVAMP721d and MtVAMP721e vesicles at the site of bacterial release and near the symbiosome and periarbuscular membrane. (A) MtVAMP721d-positive vesicles accumulate at local regions (arrowheads) of infection threads (*it*). Composite plants with transgenic roots expressing *VAMP721d::GFP-VAMP721d* were inoculated with *S. meliloti* 2011 constitutively expressing RFP. Root nodules were hand-sectioned, exposed to anti-GFP antibodies and secondary antibodies coupled with Alexa488 and analyzed by confocal microscopy. (B) Confocal immunolocalization of VAMP721d/e using the anti-VAMP721d/VAMP721e antibody on *Medicago* wild-type root infected by *G. intraradices*. Signal from anti-VAMP721d/VAMP721e antibodies is localized near the fine branches (arrow) of mature arbuscule and absence in intraradical hypha (arrowhead). Root was hand-sectioned and exposed to anti-VAMP721d/VAMP721e antibodies and secondary antibodies coupled with Alexa488. Note the markedly low signal in noninfected cells. (C and D) GFP-MtVAMP721d and GFP-MtVAMP721e vesicles fuse with the symbiosome membrane (arrow) of young symbiosomes (C) and near the site of bacteria release (D). GFP-VAMP721e is visualized by EM immunogold detection on nodules expressing either *VAMP721e::GFP-VAMP721e* (C) or *VAMP721d::GFP-VAMP721d* (D) using anti-GFP antibodies (10 nm) and anti-VAMP721d/VAMP721e antibodies (15 nm). White arrowhead, gold-labeled vesicle in contact with the symbiosome membrane. This shows that VAMP721d-positive vesicles accumulate at the region of the infection thread where an unwalling droplet (*uwd*) is formed and bacteria are released (D). (Scale bars, 10  $\mu$ m in A and B, 100 nm in C, 200 nm in D.)

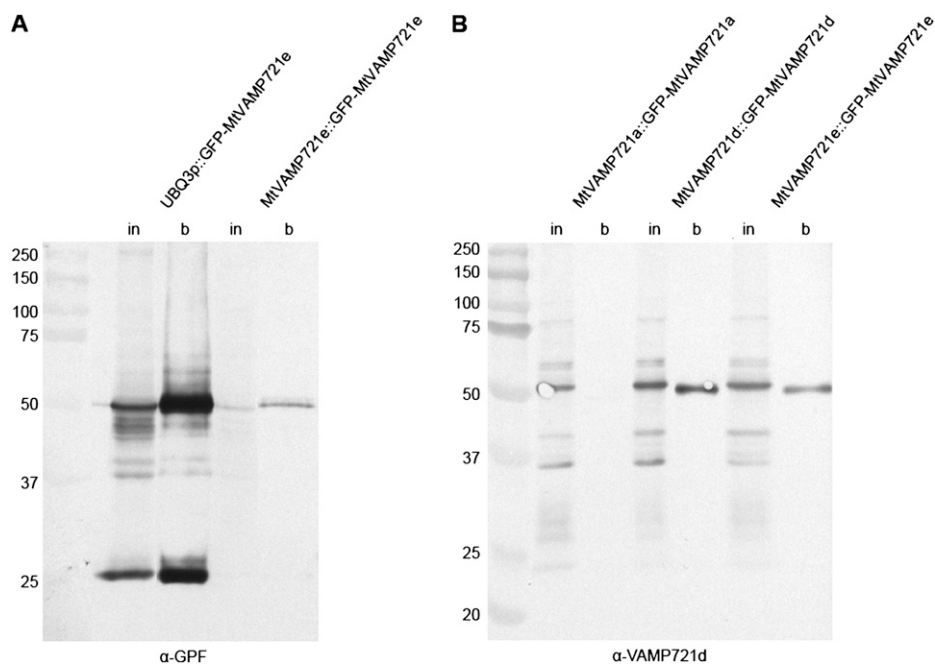

**Fig. S6.** (A) MtVAMP721e is present at low level in plant tissue. Total protein fractions were extracted from transgenic roots expressing GFP fusions of *VAMP721e* under control of the constitutive *Arabidopsis UBQ3* or native 2.5-kb promoters and used for immunoprecipitation using anti-GFP coated agarose beads. Equal amount of crude extract (*in*) and bound fraction (*b*) were subjected to immunoblot and detected using anti-GFP antibody. The fusion proteins of the predicted size (53.5 kDa) are detected. Note the presence of free GFP (27 kDa) in *UBQ3::GFP-MtVAMP721e*-expressing lines. (B) Specific antibodies raised against MtVAMP721d cross-react with VAMP721e. Total protein fractions were extracted from transgenic roots expressing GFP fusions of *VAMP721a*, *VAMP721d*, or *VAMP721e* under control of the constitutive *Arabidopsis UBQ3* promoter and used for immunoprecipitation using anti-GFP coated agarose beads. Precipitated proteins were subjected to immunoblot and detected using anti-MtVAMP721d antibody. The antibody against MtVAMP721d cross-reacts with VAMP721e; however, it does not react with VAMP721a.

**Table S1. Medicago VAMP72 genes**

| Gene name         | Corresponding gene locus or TC number |
|-------------------|---------------------------------------|
| <i>MtVAMP721a</i> | Medtr4g023810*, TC95333               |
| <i>MtVAMP721b</i> | Medtr7g064880                         |
| <i>MtVAMP721c</i> | Medtr7g064860, TC171206               |
| <i>MtVAMP721d</i> | Medtr2g034380, TC106930               |
| <i>MtVAMP721e</i> | Medtr4g114750, TC106931               |
| <i>MtVAMP724</i>  | TC110430                              |
| <i>MtVAMP727</i>  | AC233577_38                           |

\*Accession numbers are presented according to Phytozome database (<http://www.phytozome.net/>).



**Table S3. Oligonucleotides used in a study**

| Name                                                    | Sequence (5'→3')                           |
|---------------------------------------------------------|--------------------------------------------|
| <b>For quantitative PCR</b>                             |                                            |
| MtVAMP721a-F                                            | CTGTGTGCCATGGCTTCAGTTGTTA                  |
| MtVAMP721a-R                                            | GCATCCTACCACACCTTATTCACCTCC                |
| MtVAMP721b-F                                            | CGCTGAATACACCGAGTTCA                       |
| MtVAMP721b-R                                            | GTCCAGCAGACTCAACAGCA                       |
| MtVAMP721c-F                                            | CGCCCATGATGGATTTACTT                       |
| MtVAMP721c-R                                            | CTCCTTCAATTTTCGGTCCAA                      |
| MtVAMP721d-F                                            | TGTGGCTGCAAAACATGAAGGTAAA                  |
| MtVAMP721d-R                                            | TGGAATAACAATAAAGGCCACAGAGAA                |
| MtVAMP721e-F                                            | GATCACCCGGAGGAGGTGAGTAAG                   |
| MtVAMP721e-R                                            | GCCACATTTTTCTGCGGATTTTG                    |
| MtVAMP724-F                                             | AGATAGATGCAAAACAACAACACGAAGC               |
| MtVAMP724-R                                             | GAGCTGCAATGGCAGGGGAAGTTAC                  |
| MtVAMP727-F                                             | GATCGTGGGGAGAAGATTGA                       |
| MtVAMP727-R                                             | AACATTTGAAACCCCAACA                        |
| <b>To generate DNA fragments for RNA interference</b>   |                                            |
| MtVAMP721a-F                                            | <b>CACCGTGTGCCATGGCTTCAGTTGTTA</b>         |
| MtVAMP721a-R                                            | ACATTATGCATCCTACCACACCTTATTC               |
| MtVAMP721d-F                                            | <b>CACCGACTCGGGGATAATAAGCACCATTC</b>       |
| MtVAMP721d-R                                            | GAATGGAACCAAACTTCAAACAGACA                 |
| MtVAMP721e-F                                            | <b>CACCCCTTAAGAATAAATAAACGCCACTCTCG</b>    |
| MtVAMP721e-R                                            | TAGAAGCATTAGTATATCATCATCACCATCA            |
| MtVAMP724-F                                             | <b>CACCTGCGGTGGATTTAACTGTTCAA</b>          |
| MtVAMP724-R                                             | CATCCAATCATACTTCCACCATCTTCA                |
| MtVAMP721d,e -F                                         | AGTTTGTTTTCCATTCCTTAAGAATAAATA             |
| MtVAMP721d,e -R                                         | TATTTATTCTTAAGGGAATGGAACCAAACT             |
| <b>To generate DNA fragments of promoter regions</b>    |                                            |
| MtVAMP721a-F                                            | <b>CACCAAGCTTTCAGTGCAAGCTGGTCA</b>         |
| MtVAMP721a-R                                            | ACTAGTGAATGATCACAATTCACAACCTC              |
| MtVAMP721d-F                                            | <b>CACCAAGCTTTTTATGCCAAACAAGAGCATC</b>     |
| MtVAMP721d-R                                            | ACTAGTTGAAGAAGAGATCTGAGAATGGT              |
| MtVAMP721e-F                                            | <b>CACCATATGATCACAAGACACAACCACA</b>        |
| MtVAMP721e-R                                            | CTTCTTCTCCACAGATCTATCGAAC                  |
| <b>To generate coding sequences of gene of interest</b> |                                            |
| MtVAMP721a-F                                            | <b>CACCATGGGACAACAATCATTGATCTATAGCTTTG</b> |
| MtVAMP721a-R                                            | TCCTACCACACCTTATTCACCTCCCTTCC              |
| MtVAMP721d-F                                            | <b>CACCATGGCGAACCAACCAGAATCAGAAG</b>       |
| MtVAMP721d-R                                            | GATAATCACAAGGTTGGAATAACAATAAAG             |
| MtVAMP721e-F                                            | <b>CACCATGGGACAGAACCAAAAATCTCTGA</b>       |
| MtVAMP721e-R                                            | CCTCATCATCATCATATAATAATCACA                |

Sequences designated in boldface are added to forward primer for TOPO cloning.
